# Supplementary material for: Identification and Validation of PCAT14 as Prognostic Biomarker in Prostate Cancer
Source: PubMed Central journal article supplement — Neoplasia. 2016 Sep 9;18(8):489–99. doi: 10.1016/j.neo.2016.07.001 (PMC5018094; doi:10.1016/j.neo.2016.07.001), 2016-09-09

# Supplementary Figure 1

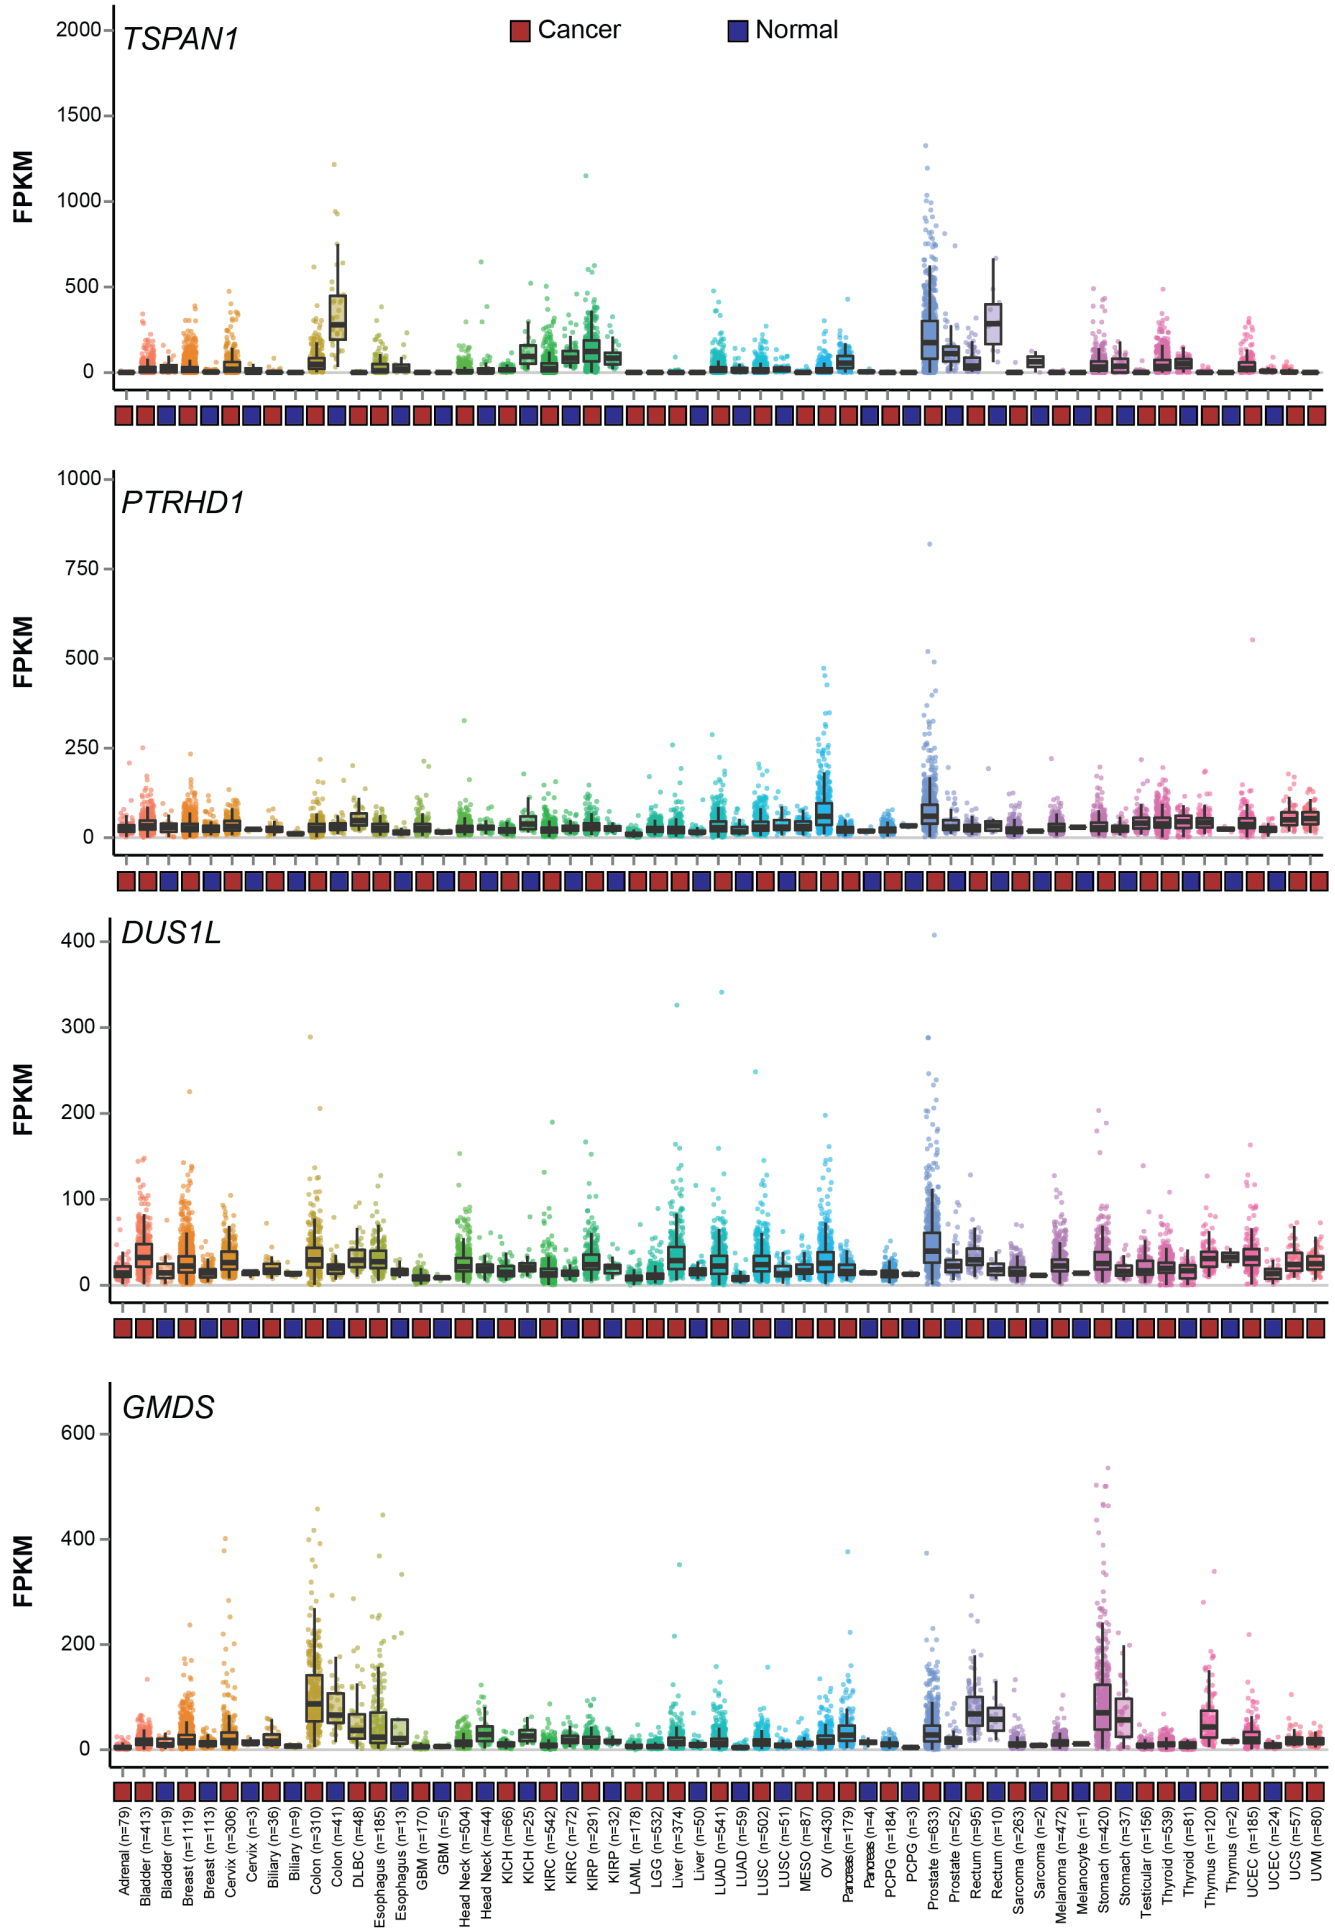

# Supplementary Figure 2

A

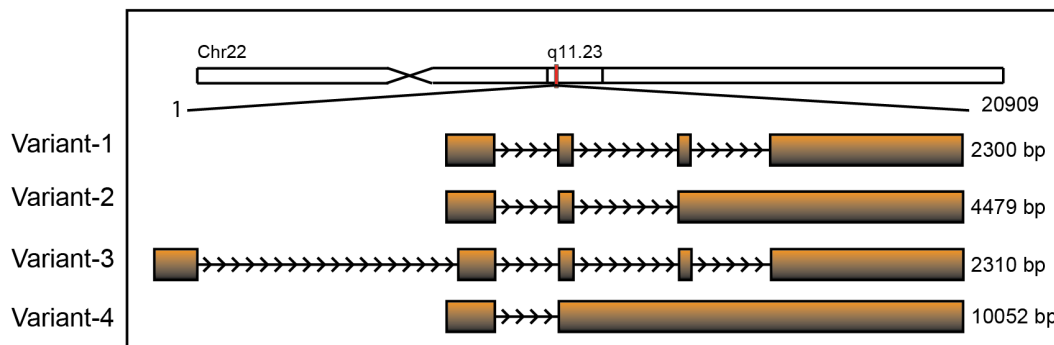

B

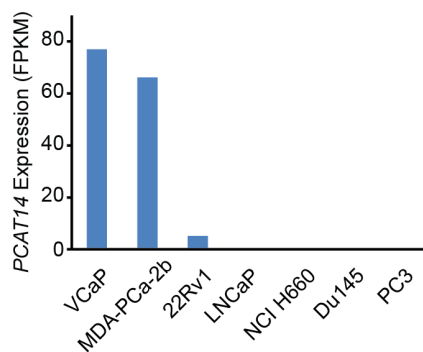

C

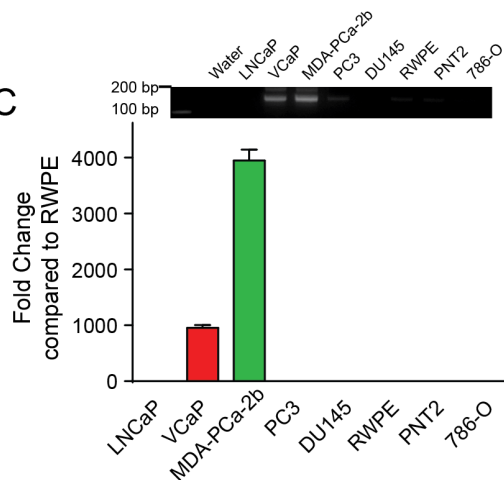

D

## Genomic organization of *PCAT14* major transcript variant

Exon 1 `tgatcAATAAATACTGAGGGAACCTCAGAGACCGGTGCGGCGCGGGTCTCCATATGCTGAGCGCCGGTCCCCTGGGCCACTTTTCTTTCTCTATACTTTGICTCTGTTGTCTTTCTTTCTCAAGTCTCTCGTTCCACCTGAGGAGAAATGCCACAGCTGTGGAGGCGCAGGCCACTCCATCTGGTGCCCAACGTGGATGCTTTTCTCTAGGGTGAAGGACTCTCGAGTGTGGTCATTGAGGACAAGTCAACGAGAGATTCCCAGTACGTCTACAGTGAGCCTTG`  
TGgtaagct Splice donor site

Splice acceptor site

Exon 2 `tctagGGTGAAGGTACTCTACAGTGTGGTCATTGAGGACAAGTTGACGAGAGAGTCCCAAGTACGTCCACGGTCAGCCTTGCCGgtaagc` Splice donor site

Splice acceptor site

Exon 3 `cactagACATTTAAAGTTCTACAATGAACTCACTGGAGATGCAAAGAAAAGTGTGGAGATGGAGACACCCCAA`  
TCGACTCGCCAGgtaaac Splice donor site

Splice acceptor site

Exon 4 `ttgttagTCTACAGGTGTATCCA GCAGCTCCAAAGAGACAGCAACCAGCAAGAATGGGCCATAGTGACGATGGTGGTTTTGTCAAAAAGAAAAGGGGGGATATGTAAGGAAAAGAGAGATCAGACTTTCAGTGTCTATGTAGAAAAGGAAGACATAAGAACTCCATTTTGATCTGTACTAAGAAAAATTGTTTTGCCTTGAGATGCTGTTAATCTGTAACTTTAGCCCCAACCTGTGCTCACGGAAACATGTGCTGTAAGGTTAAGGGATCTAGGGCTGTGCA`  
GGATGTACCTTTAACAATATGTTTGCAGGCAGTATGTTTGGTAAAAGTCATCGCCATTCTCCATTCTCGATTAACACAGGGCTCAATGCACCTGTGAAAGCCACAGGAACCTCTGCCAAGAAAAGCTGTGCTGTTGTGGGAA  
GTCAGGGACCCCGAATGGAGGGACCAGCTGGTGTGCATCAGGAAACATAAATTGTGAAGATTTCTTGGAC  
ATTTATCAGTTTCCAAAATTAATACTTTTATAATTTCTTACACCTGTCTTACTTTAATCTCTTAATCCTGTTAT  
CTTTGTAAGCTGAGGATATACGTCACCTCAGGACCACTATTGTACAAATTGATTGTAACATGTTTCACATG  
TGTTTGAACAATATGAAATCAGTGCACCTTGAAAATGAACAGAATAACAGTGATTTTAGGGAAACAAAGGAA  
GACAACCATAAGGTCTGACTGCCTGAGGGGTGCGGCAAAAAGCCATATTTTCTTCTTGACAGAGAGCCTAT  
AAATGGACGTGCAAGTAGGAGAGATATTGCTAAATCTTTTCTAGCAAGGAATATAATACTAAGACCCTA  
GGGAAAGAAATTGCATTCCTGGGGGAGGTCTATAAACGCCCGCTCTGGGAGTGTCTGTCTTATGTTGATA  
GATAAGGACTGAGATACGCCCTGGTCTCCTGCAAGTACCCTCAGGCTACTAGGATTTGGGAAACCCAGTCTT  
GGTAAATTTGAGGTCAGGCCGGTCTTTGCTCTGAACCCTGTTTTCTGTTAAGATGTTTATCAAGACAATAC  
ATGCACCGCTGAACATAGACCCTTATCAGGAGTTTCTGATTTTGTCTGTCCTGTTTCTTTCAGAACATGTC  
ATCTTTGCTCTGCCCTTTCGCCCTTGAAGCATGTGATCTTTGTGACCTACTCCCTGTTCATACACCCCTCCCTT  
TTAAAAATCCCTAATAAA AACTGCTGGTTTTGTGGCTCAGGGGGCATCATGGAC Caaaaaaaaa

Polyadenylation signal sequence Polyadenylation

Supplementary Figure 3

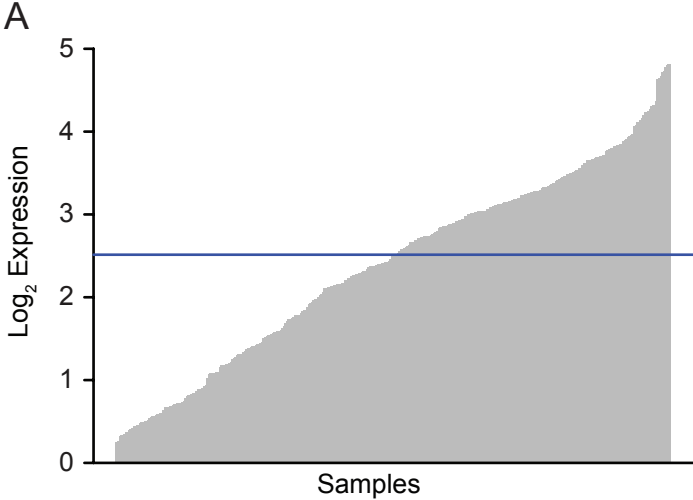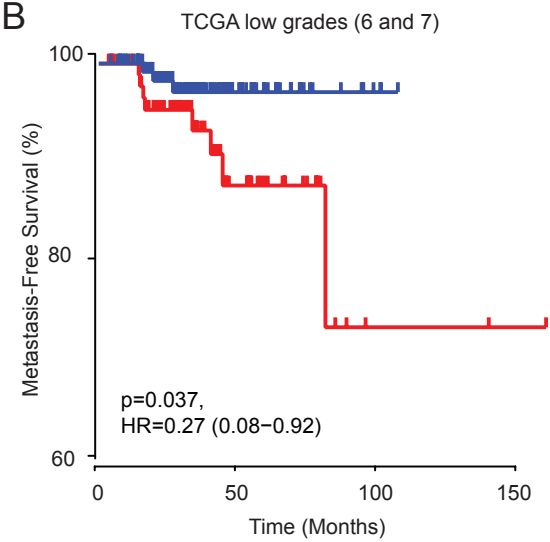

Supplementary Figure 4

A MDA-PCa-2b Xenograft

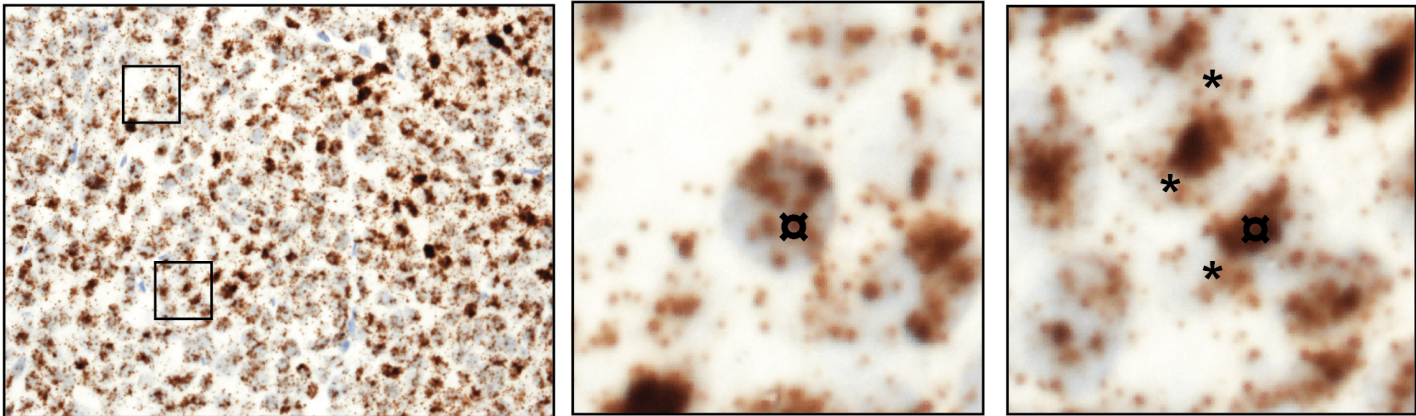

☐ Nuclear Staining      \* Cytoplasmic Staining

B

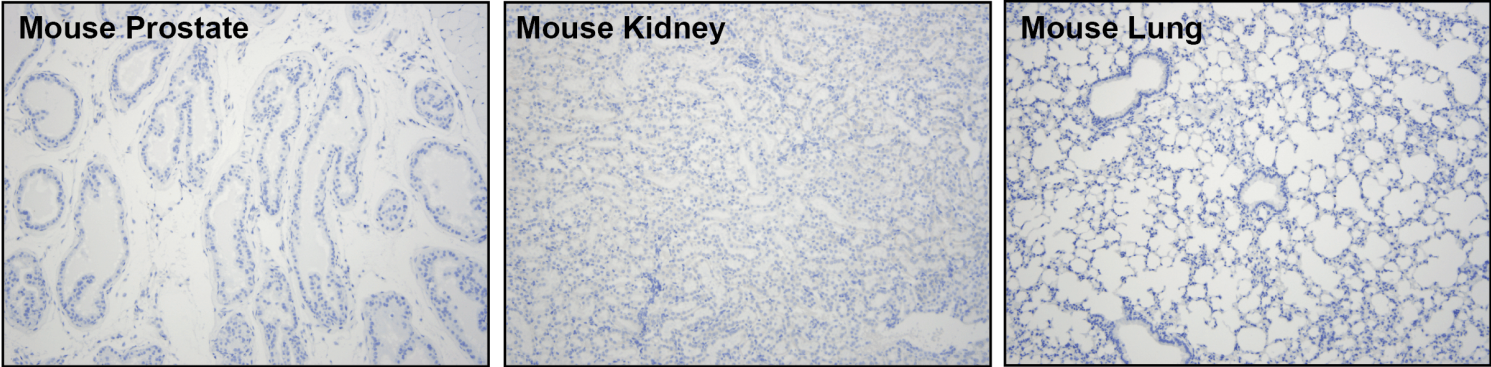

# Supplementary Figure 5

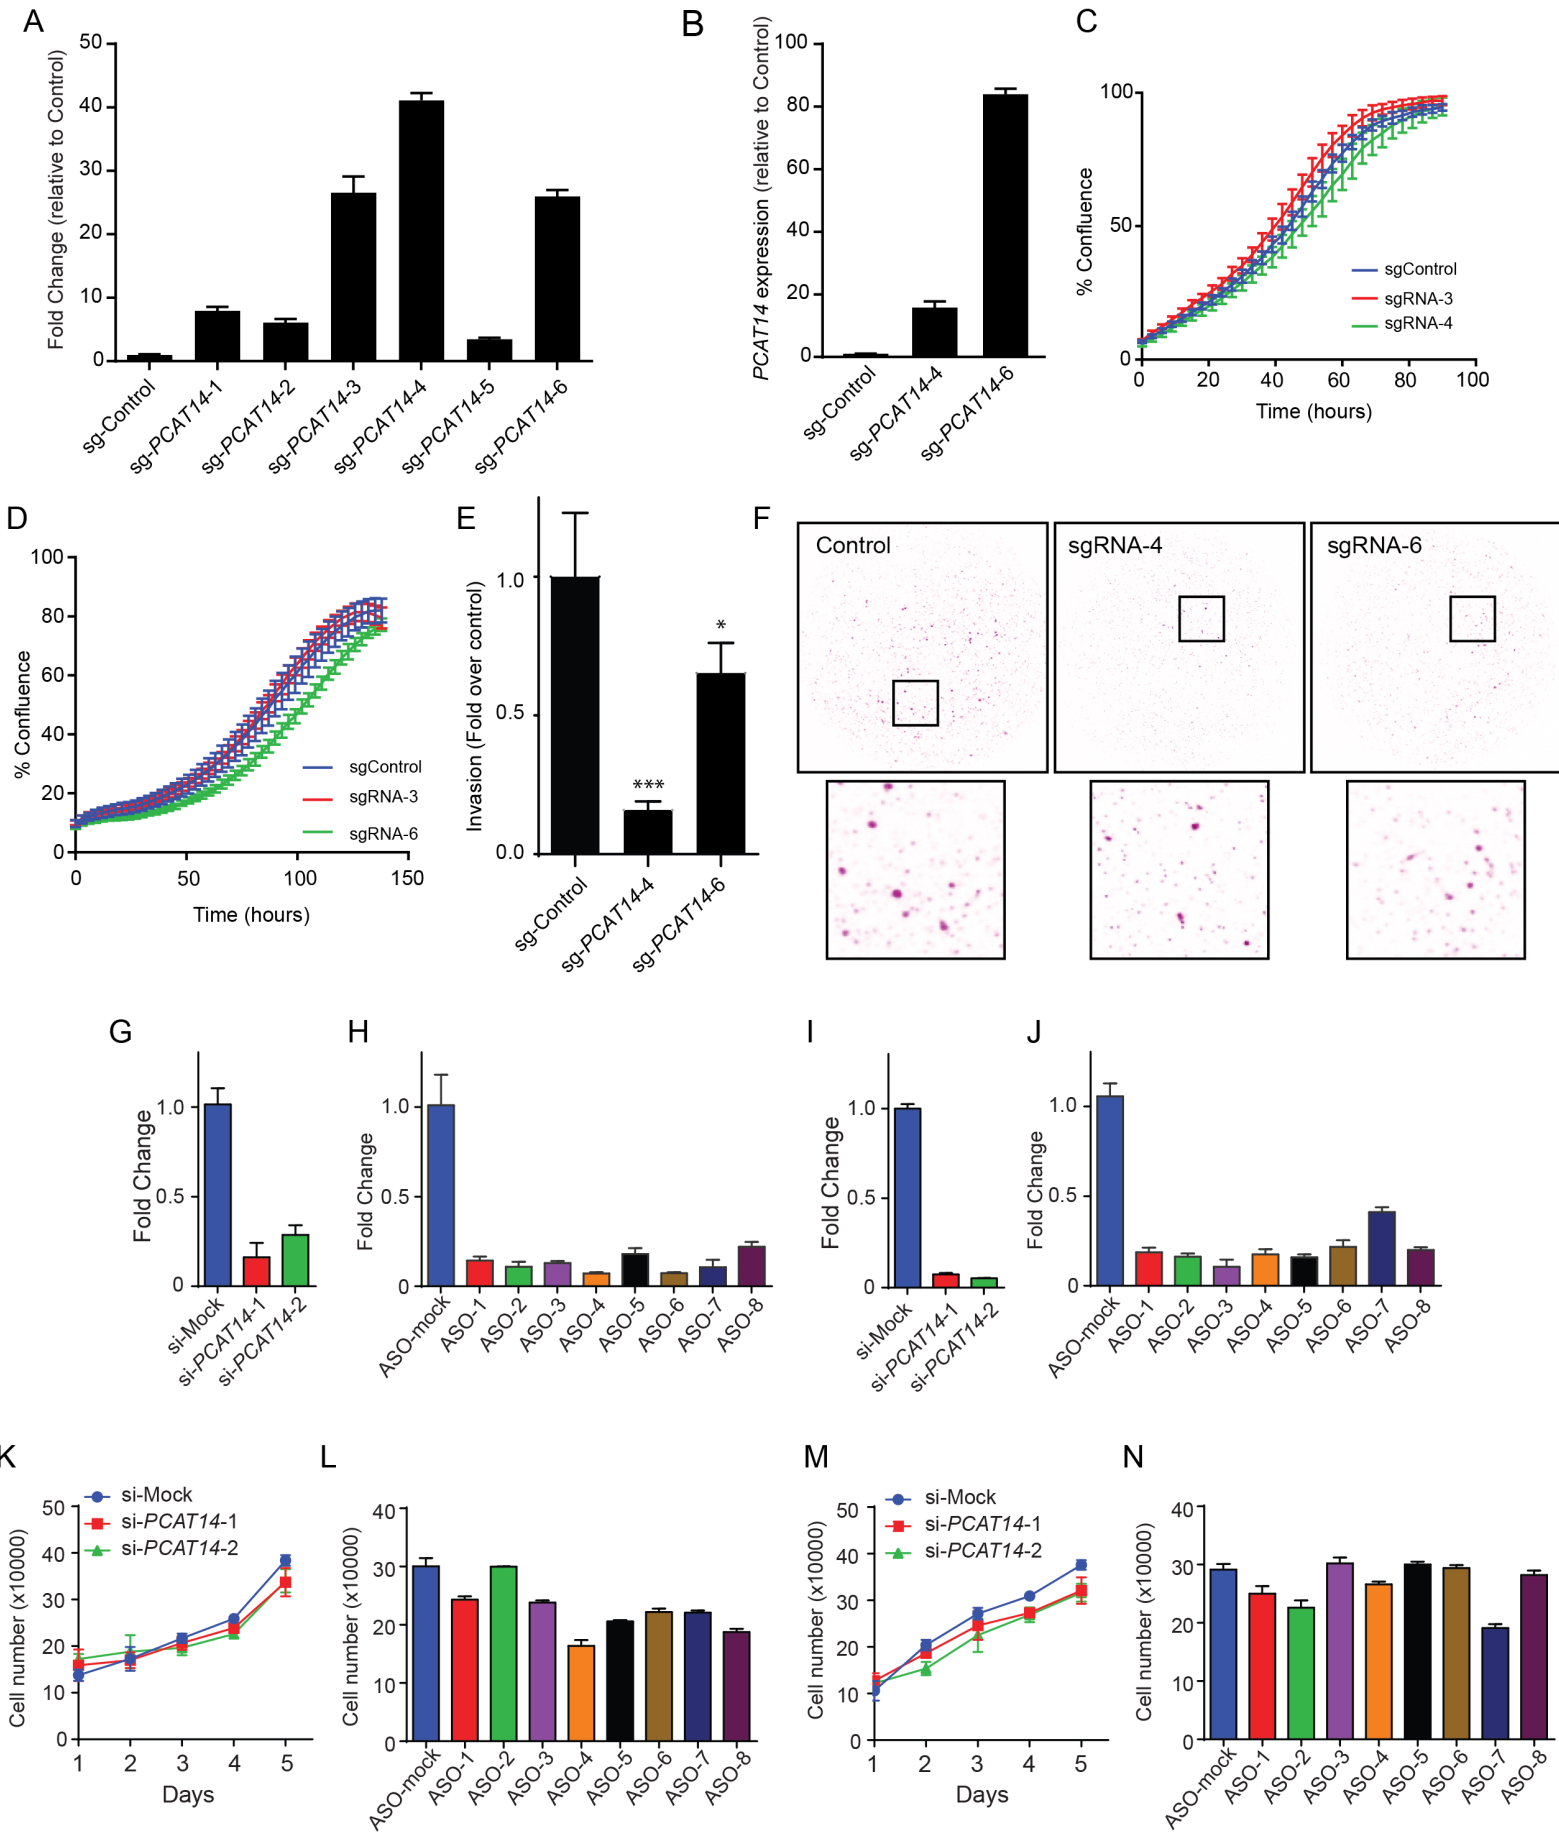

Supplement: mmc1.pdf [file mmc1.pdf]
