# Supplementary material for: Identification and Validation of PCAT14 as Prognostic Biomarker in Prostate Cancer
Source: PubMed Central journal article supplement — Neoplasia. 2016 Sep 9;18(8):489–99. doi: 10.1016/j.neo.2016.07.001 (PMC5018094; doi:10.1016/j.neo.2016.07.001), 2016-09-09
Supplement: mmc4.pdf [file mmc4.pdf]

Supplementary Table 3: Multivariate Analysis in JHU cohort

|                   | High          | Low           | Total         | P-value |
|-------------------|---------------|---------------|---------------|---------|
| <b>Age</b>        | 59.2 +/- 6.15 | 59.9 +/- 5.77 | 59.5 +/- 5.97 | 0.288   |
| <b>Age=NA</b>     | 0 (0)         | 0 (0)         | 0 (0)         |         |
| <b>PSA=0</b>      | 103 (0.579)   | 106 (0.599)   | 209 (0.589)   | 0.775   |
| <b>PSA=1</b>      | 56 (0.315)    | 56 (0.316)    | 112 (0.315)   |         |
| <b>PSA=2</b>      | 19 (0.107)    | 15 (0.085)    | 34 (0.096)    |         |
| <b>PSA=NA</b>     | 0 (0)         | 0 (0)         | 0 (0)         |         |
| <b>Gleason=0</b>  | 5 (0.028)     | 2 (0.011)     | 7 (0.02)      | 0.0107  |
| <b>Gleason=1</b>  | 120 (0.674)   | 96 (0.542)    | 216 (0.608)   |         |
| <b>Gleason=2</b>  | 53 (0.298)    | 79 (0.446)    | 132 (0.372)   |         |
| <b>Gleason=NA</b> | 0 (0)         | 0 (0)         | 0 (0)         |         |
| <b>sm=0</b>       | 131 (0.736)   | 122 (0.689)   | 253 (0.713)   | 0.393   |
| <b>sm=1</b>       | 47 (0.264)    | 55 (0.311)    | 102 (0.287)   |         |
| <b>sm=NA</b>      | 0 (0)         | 0 (0)         | 0 (0)         |         |
| <b>svi=0</b>      | 138 (0.775)   | 131 (0.74)    | 269 (0.758)   | 0.516   |
| <b>svi=1</b>      | 40 (0.225)    | 46 (0.26)     | 86 (0.242)    |         |
| <b>svi=NA</b>     | 0 (0)         | 0 (0)         | 0 (0)         |         |
| <b>ece=0</b>      | 66 (0.371)    | 51 (0.288)    | 117 (0.33)    | 0.123   |
| <b>ece=1</b>      | 112 (0.629)   | 126 (0.712)   | 238 (0.67)    |         |
| <b>ece=NA</b>     | 0 (0)         | 0 (0)         | 0 (0)         |         |
| <b>Ini=0</b>      | 145 (0.815)   | 148 (0.836)   | 293 (0.825)   | 0.693   |
| <b>Ini=1</b>      | 33 (0.185)    | 29 (0.164)    | 62 (0.175)    |         |
| <b>Ini=NA</b>     | 0 (0)         | 0 (0)         | 0 (0)         |         |
